# Supplementary material for: TOP2A Promotes Lung Adenocarcinoma Cells' Malignant Progression and Predicts Poor Prognosis in Lung Adenocarcinoma
Source: PubMed Central journal article supplement (PMC7066024; doi:10.7150/jca.41415), 2020-02-10
Supplement: jcav11p2496s1.pdf [file jcav11p2496s1.pdf]

**Supplementary Materials:**

Fig S1A

The constructed PPI network of the common DEGs screened out from the four datasets.

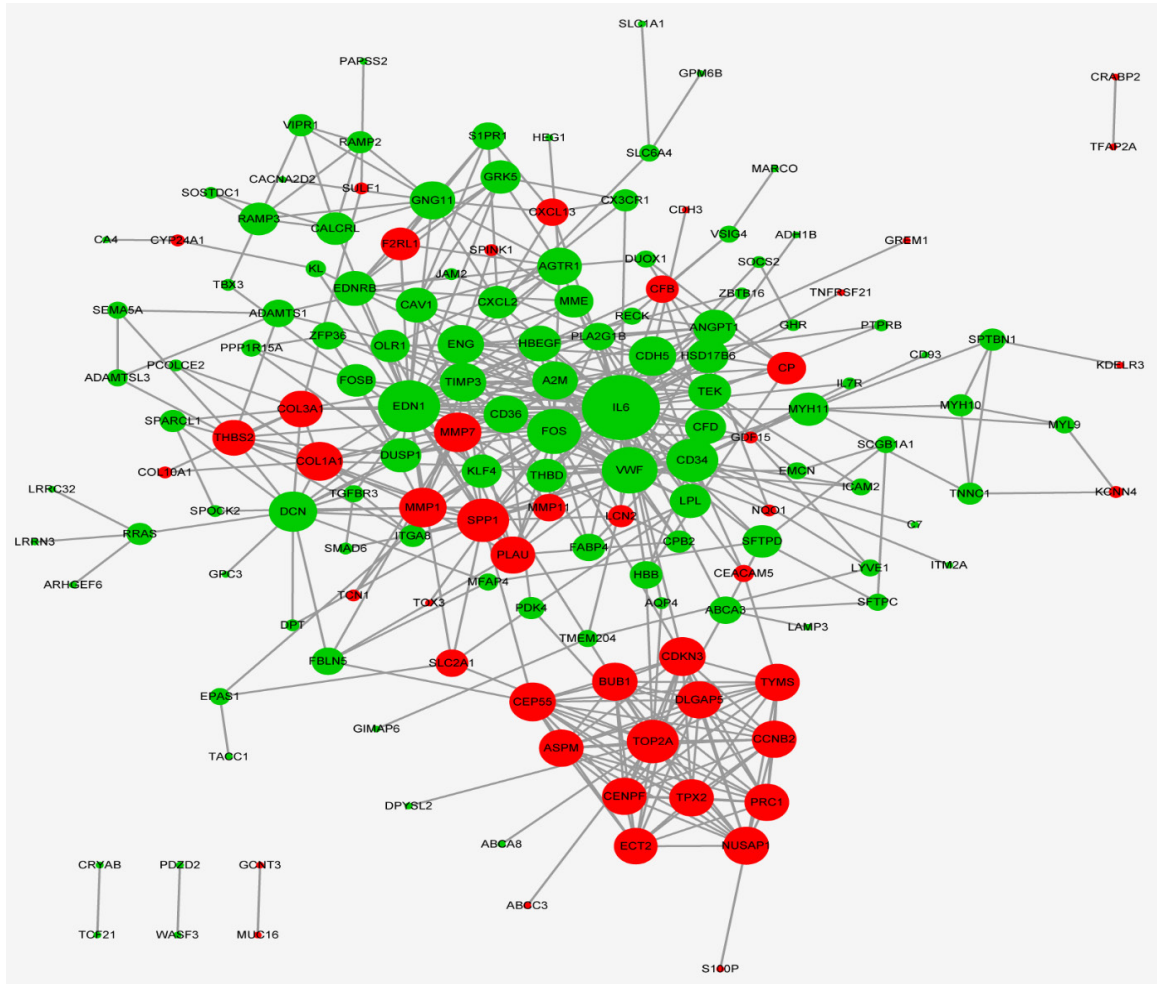

The PPI network was constructed by 154 DEGs filtered out from STRING database. The red and green nodes represent up- and down-regulated DEGs, respectively. And the larger the node, the higher the degree.

Table S1

The connectivity degrees corresponding to hub genes in the PPI network

| Gene | Degree | Gene | Degree |
|------|--------|------|--------|
| IL6  | 48     | BUB1 | 13     |

|        |    |        |    |
|--------|----|--------|----|
| EDN1   | 31 | NUSAP1 | 13 |
| VWF    | 24 | A2M    | 13 |
| FOS    | 22 | GNG11  | 13 |
| SPP1   | 20 | CENPF  | 12 |
| TOP2A  | 20 | PLAU   | 12 |
| CD34   | 20 | CD36   | 12 |
| TIMP1  | 18 | PRC1   | 12 |
| DCN    | 16 | TPX2   | 12 |
| MMP1   | 15 | CCNB2  | 12 |
| MMP7   | 15 | ASPM   | 12 |
| CDH5   | 15 | AGTR1  | 12 |
| CEP55  | 14 | TYMS   | 12 |
| TIMP3  | 14 | DLGAP5 | 12 |
| CDKN3  | 14 | COL3A1 | 11 |
| ENG    | 14 | ECT2   | 11 |
| COL1A1 | 14 |        |    |

Fig S1B

The Kaplan-Meier curves of the remaining 18 hub up-regulated genes obtained by R software

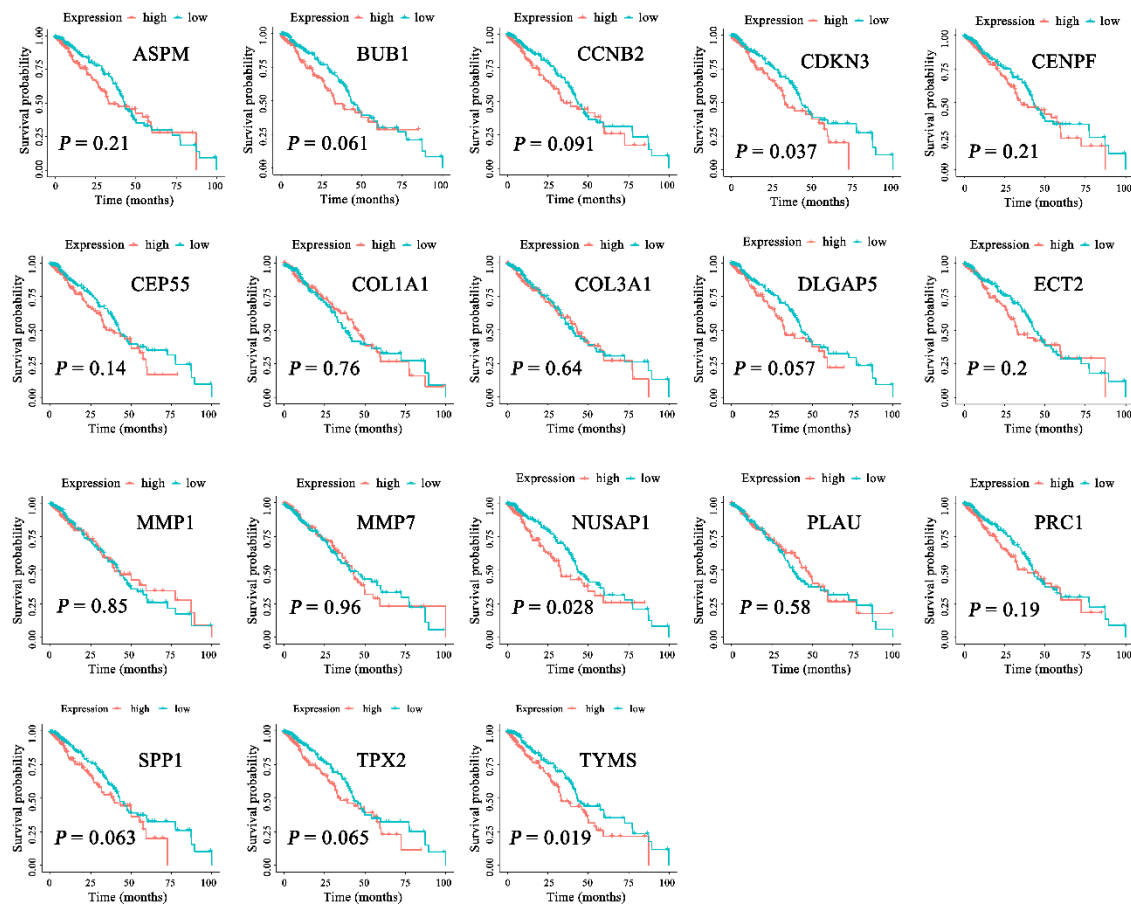

The Kaplan-Meier curves demonstrated that the expression levels of these genes were not significantly related to the prognosis of patients (all  $P > 0.01$ )

Fig S1C

The violin plots demonstrated the median, p value and 95% CI of CCNE2, CDK1, RRM2 and

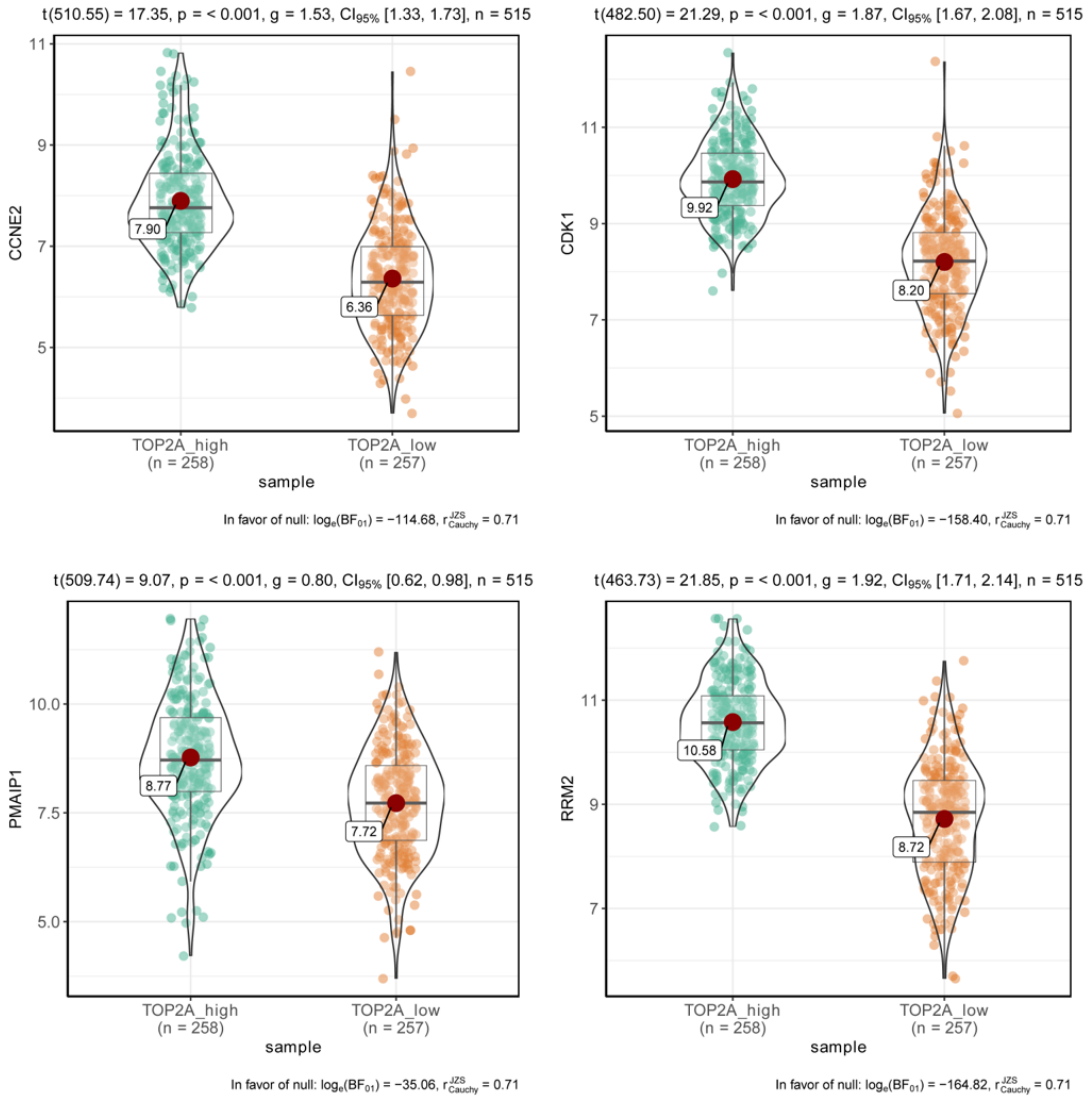

PMAIP1 between high and low TOP2A expression group in TCGA.
